# Supplementary material for: Proteomic Alterations and Novel Markers of Neurotoxic Reactive Astrocytes in Human Induced Pluripotent Stem Cell Models
Source: PubMed Central journal article supplement (PMC9113221; doi:10.3389/fnmol.2022.870085), 2022-05-03
Supplement: Data_Sheet_1.pdf [file Data_Sheet_1.pdf]

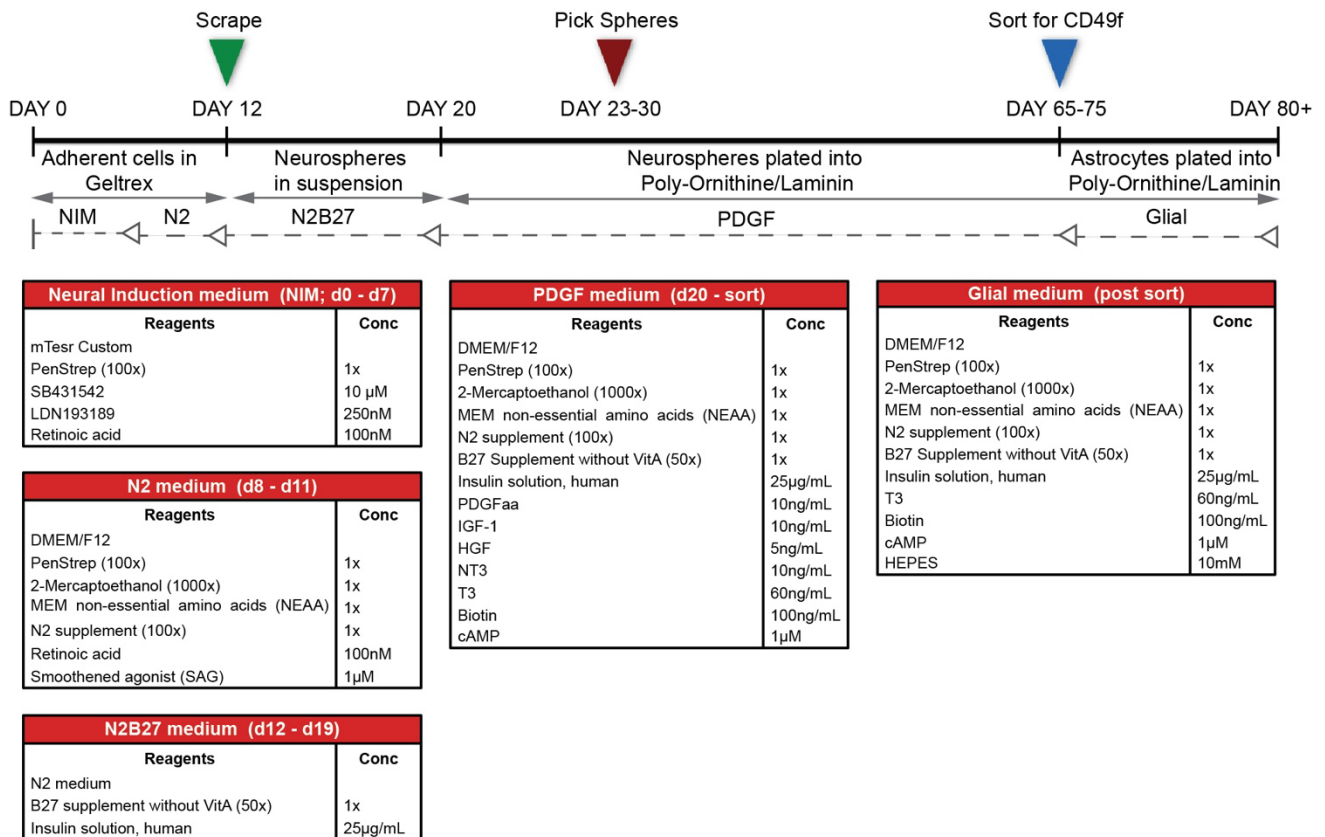

**Figure S1. Differentiation and purification of hiPSC-derived astrocytes through a serum-free protocol.** Schematic of astrocyte differentiation protocol from hiPSCs, including tables for media compositions and patterning agents.

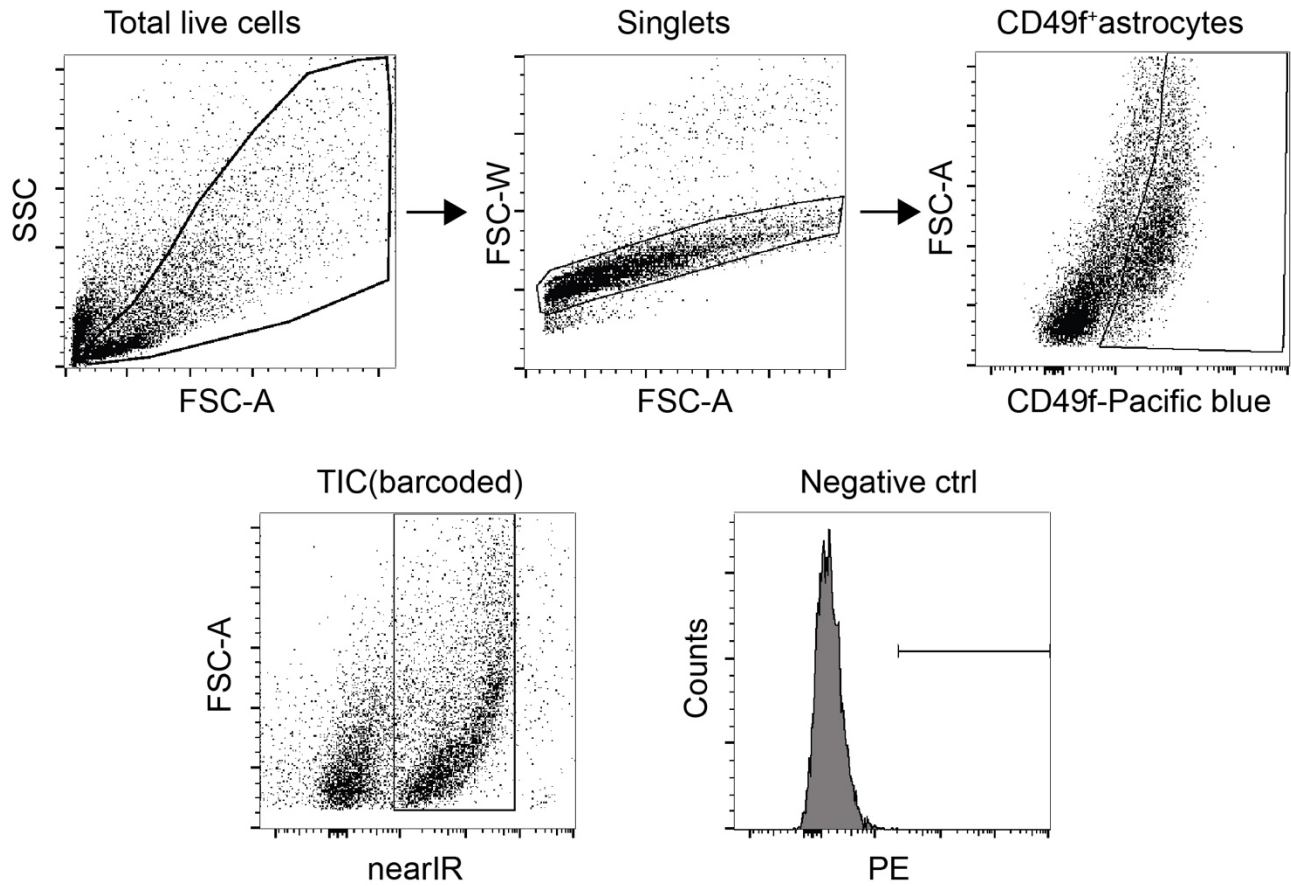

**Figure S2. Gating strategy for flow cytometry screen.** Representative gating strategy for CD49f<sup>+</sup> astrocytes and barcoded TIC-induced reactive astrocytes for flow cytometry screen; a CD49f<sup>-</sup> negative control is shown.

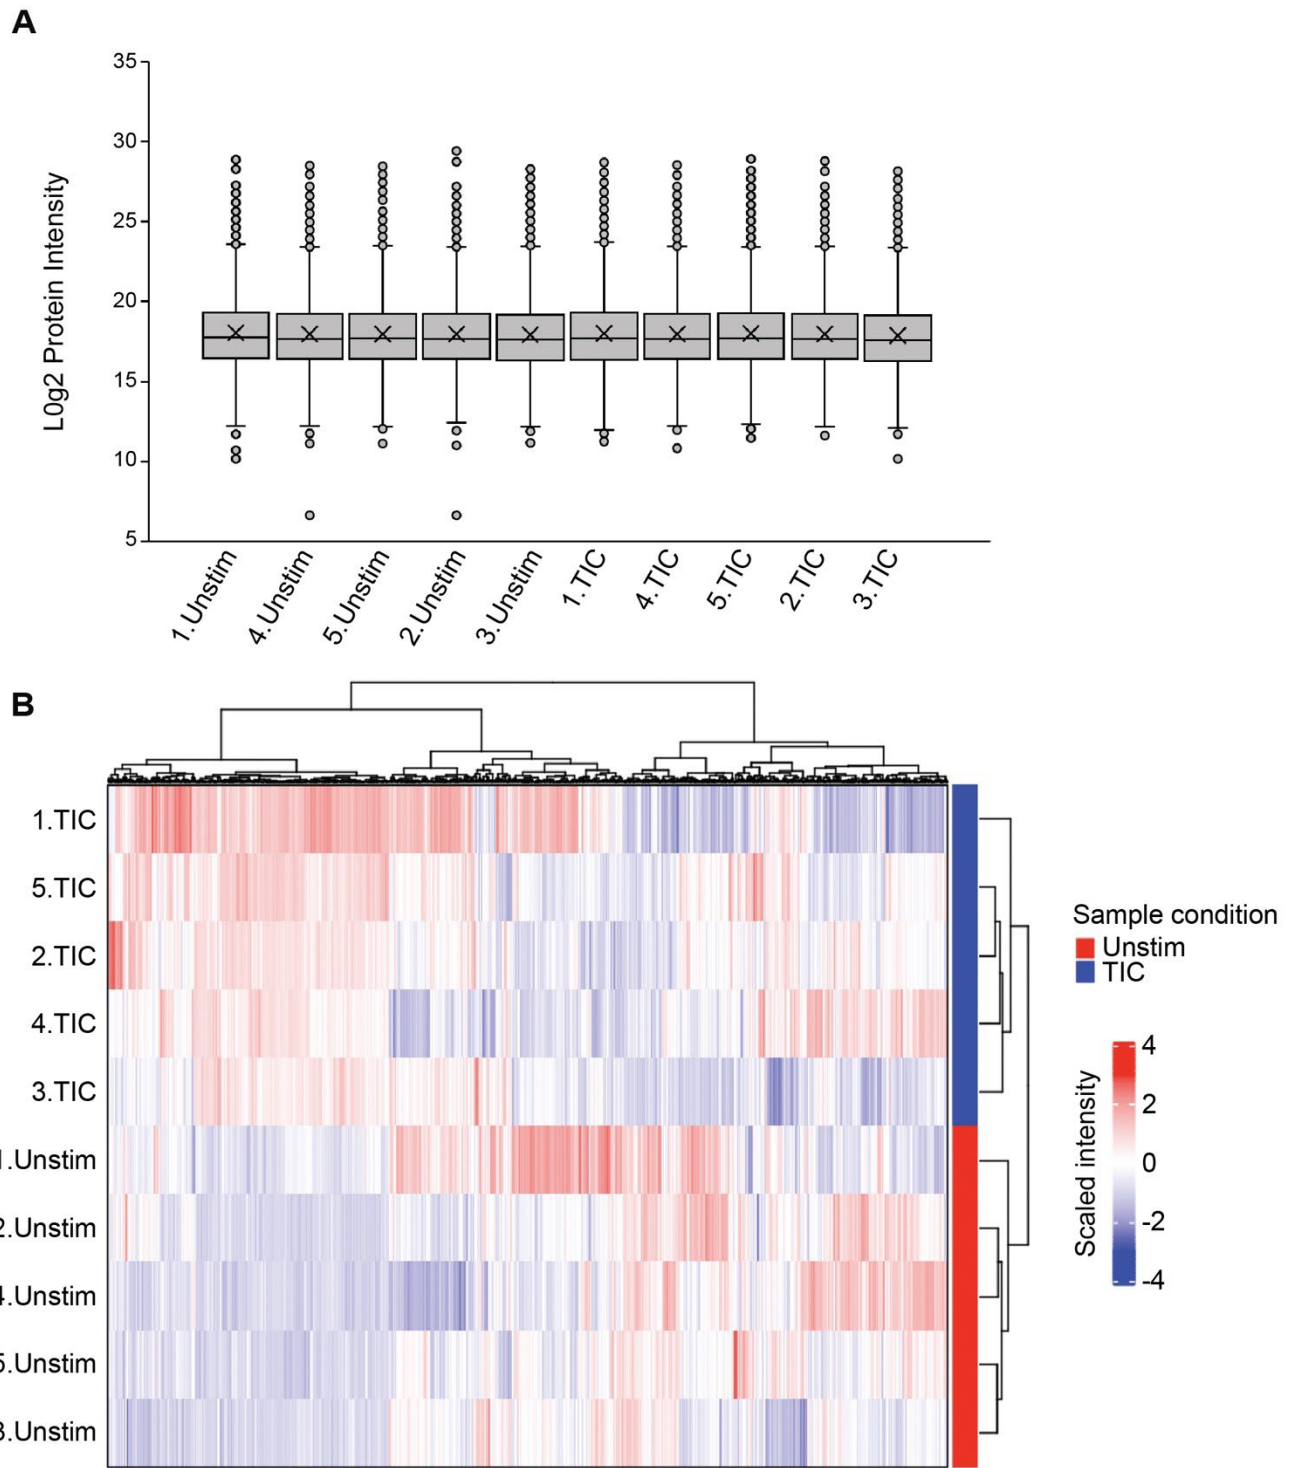

**Figure S3. Quality control and hierarchical clustering for whole cell proteomics**

(A) Box plot of protein intensities among different samples shows no obvious loading bias.

(B) Hierarchical clustering of top 10% most variable proteins shows that astrocytes from all hiPSC lines respond to TIC stimulation and cluster together, clearly separated from unstimulated astrocytes.

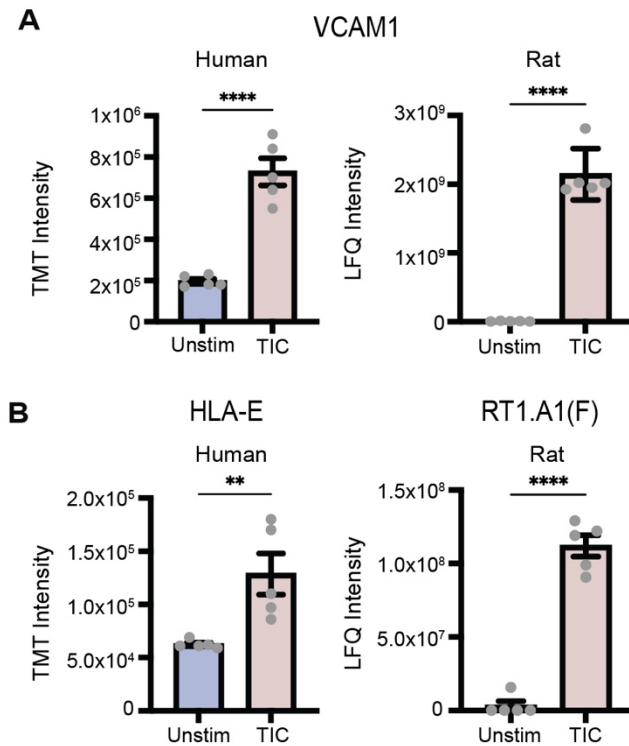

### Figure S4. Human versus rodent protein expression

(A) Quantification of VCAM1 protein abundance in human versus rat, measured by TMT-based LC/LC-MS/MS and label-free quantitative LC-MS/MS, respectively.

(B) Quantification of human HLA-E protein abundance and rat RT1.A1(F) domain (HLA-E ortholog) protein abundance.

For both quantifications, individual dots are means of three technical replicates for each line; error bars represent standard error of means. *p*-value was calculated using a two-tailed unpaired t-test. \*\*=*p*-value<0.01; \*\*\*\*=*p*-value<0.0001.

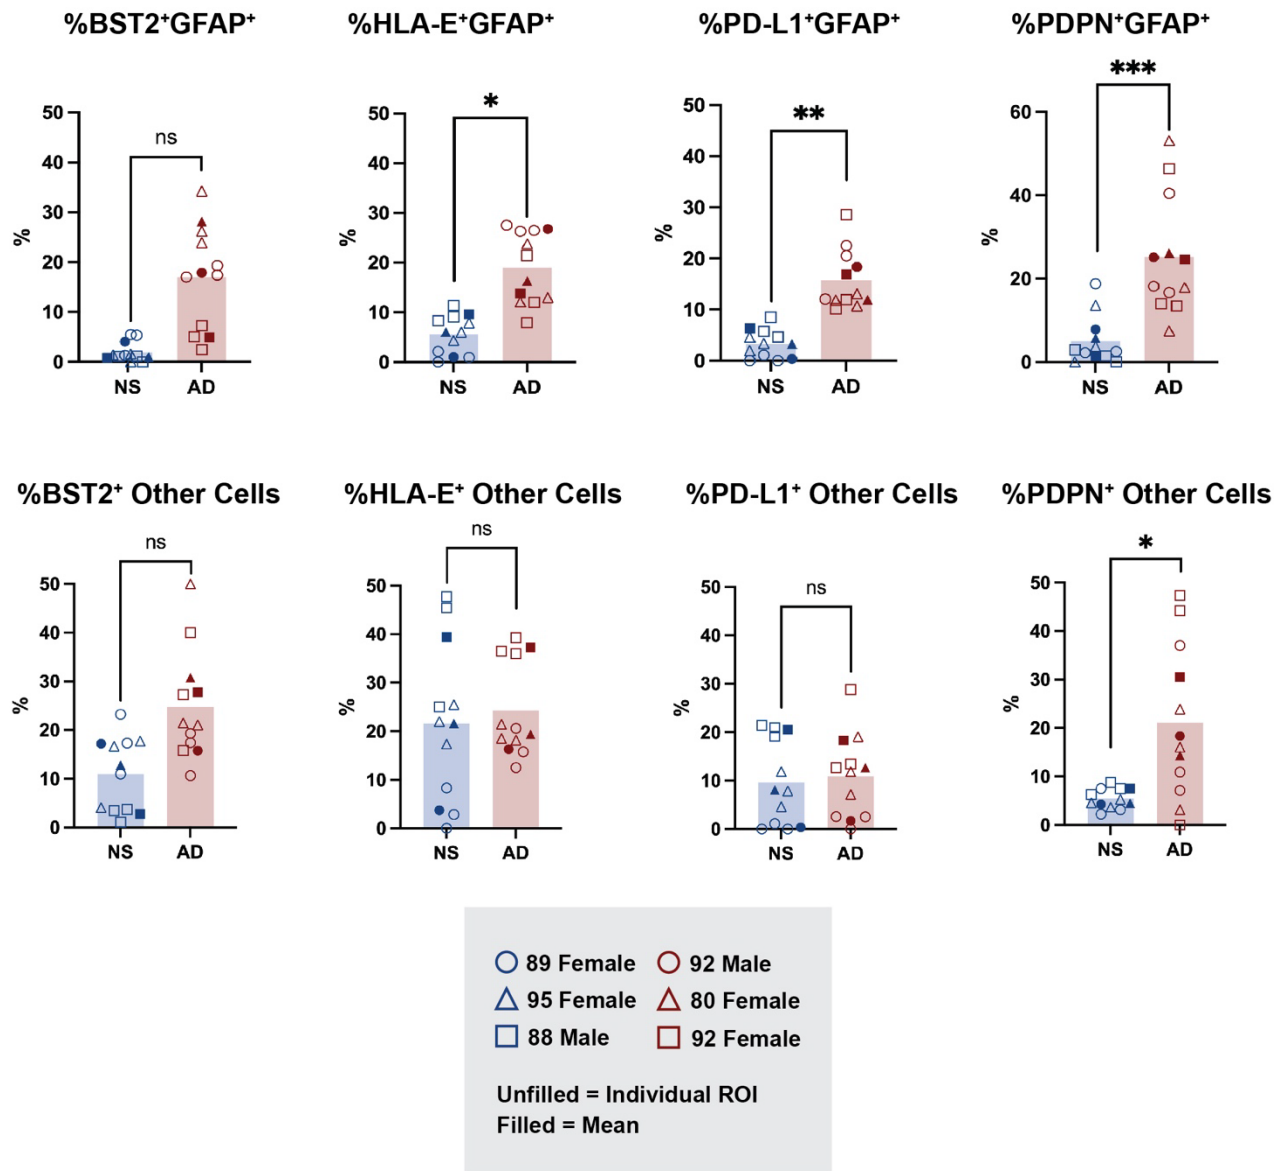

**Figure S5. Quantification of TIC-reactive markers on human tissues.**

Quantification of BST2, HLA-E, PD-L1 and PDPN from 3 different tissue sections from each condition (AD and NS). Plots show percentage of cells double positive for GFAP and marker over total DAPI cells (top) and percentage of marker positive/GFAP<sup>-</sup> cells (*i.e.* Other Cells in the CNS that are not astrocytes) over total DAPI cells. AD= Alzheimer’s disease; NS= non symptomatic. \*= p-value<0.05; \*\*= p-value<0.01; \*\*\*= p-value<0.001; \*\*\*\*=p-value<0.0001.

**NYSCF** The New York Stem Cell  
Foundation **Research Institute**

NYSCF ID: 051104-01-MR-040 Lot# E040-1E

Certificate of Analysis

|                                              |                              |
|----------------------------------------------|------------------------------|
| Product Description                          | iPS Cell Line                |
| Publication(s) describing iPSC establishment | NA                           |
| Parent cell line and cell type               | 051104-01-FB-001 Fibroblasts |
| Unique Parent Cell Line ID                   | 10-005_1104                  |
| Method of Reprogramming                      | mRNA                         |
| Media                                        | Freedom                      |
| Cell Culture Matrix                          | Geltrex                      |
| Passage method                               | Accutase                     |
| Split ratio                                  | 1:10-1:20 every 5-7 days     |
| Reported Sex (Demographics)                  | Female                       |
| Calculated Sex (DNA)                         | Female                       |

The following testing specifications have been met for the specified product lot:

| Test Description                | Test Method                                   | Test Specification                                                            | Result |
|---------------------------------|-----------------------------------------------|-------------------------------------------------------------------------------|--------|
| Post-Thaw Viable Cell Recovery  | Cryotube thaw to single well of 12 well plate | >50% Confluency reached within 10 days                                        | Pass   |
| Sterility                       | SteriTEQ                                      | Negative                                                                      | Pass   |
| Mycoplasma                      | Lonza MycoAlert Plus                          | Negative                                                                      | Pass   |
| Karyotype                       | Illumina CoreExome24                          | Normal Karyotype<br>(No Autosomal CNVs >2.5 Mb)                               | Pass   |
| Identity Match                  | Fluidigm SNPTrace Analysis                    | Match parent line                                                             | Pass   |
| Pluripotency Expression Profile | Nanostring Pluripotency Scorecard Analysis    | Express markers of pluripotency with absence of early differentiation markers | Pass   |
| Differentiation Capacity        | Nanostring 3 Germ Layer Scorecard Analysis    | Ectoderm Analysis                                                             | 0.02   |
| Differentiation Capacity        | Nanostring 3 Germ Layer Scorecard Analysis    | Mesoderm Analysis                                                             | 0.00   |
| Differentiation Capacity        | Nanostring 3 Germ Layer Scorecard Analysis    | Endoderm Analysis                                                             | 0.02   |

Notes

A negative score in the 3 germ layer analysis indicates a potentially reduced ability to differentiate into the corresponding germ layer. An asterisk indicates the line performed outside of the range of reference lines used in this analysis. For more information see Bock et al., 2011 (DOI: 10.1016/j.cell.2010.12.032).

- Pass  
 Fail  
 Other:



Daniel Paull, PhD  
Vice President, Stem Cell Technology Platforms  
Date: 03/02/2020

**Figure S6. Representative Certificate of analysis of hiPSC line.** CoA for line 2, detailing quality control tests performed after reprogramming.
